# Supplementary material for: Assessment of visually guided reaching in prodromal Alzheimer’s disease: a cross-sectional study protocol
Source: PubMed Central journal article supplement (PMC7279656; doi:10.1136/bmjopen-2019-035021), 2020-06-04
Supplement: bmjopen-2019-035021supp001.pdf [file bmjopen-2019-035021supp001.pdf]

## **The assessment of visually guided misreaching in prodromal Alzheimer's disease: study protocol**

### **Site-specific information**

#### *Site 1: Edinburgh*

Patient recruitment in Edinburgh will take place at the Anne Rowling Regenerative Neurology Clinic (NHS Lothian), through a team led by Dr. Suvankar Pal. Patients who fit the recruitment criteria will be identified through the Rowling CARE-register and provided an information sheet and a notification of interest form.

All testing (patient and control) takes place in the Human Movement Laboratory, Department of Psychology, The University of Edinburgh.

#### *Site 2: Norfolk*

Patient recruitment will take place in the Julian Hospital in Norwich (NHS Norfolk & Suffolk). A team of research nurses will identify suitable participants who will be provided an information sheet and a notification of interest form.

All testing takes place in the Vision and Action Laboratory, Department of Psychology, The University of East Anglia.
